# Supplementary material for: Expiration Date of Ready-to-Eat Salads: Effects on Microbial Load and Biochemical Attributes
Source: MDPI journal article supplement (doi:10.3390/foods10050941), 2021-04-25
Supplement: s1 [file s1]

**Supplementary materials**

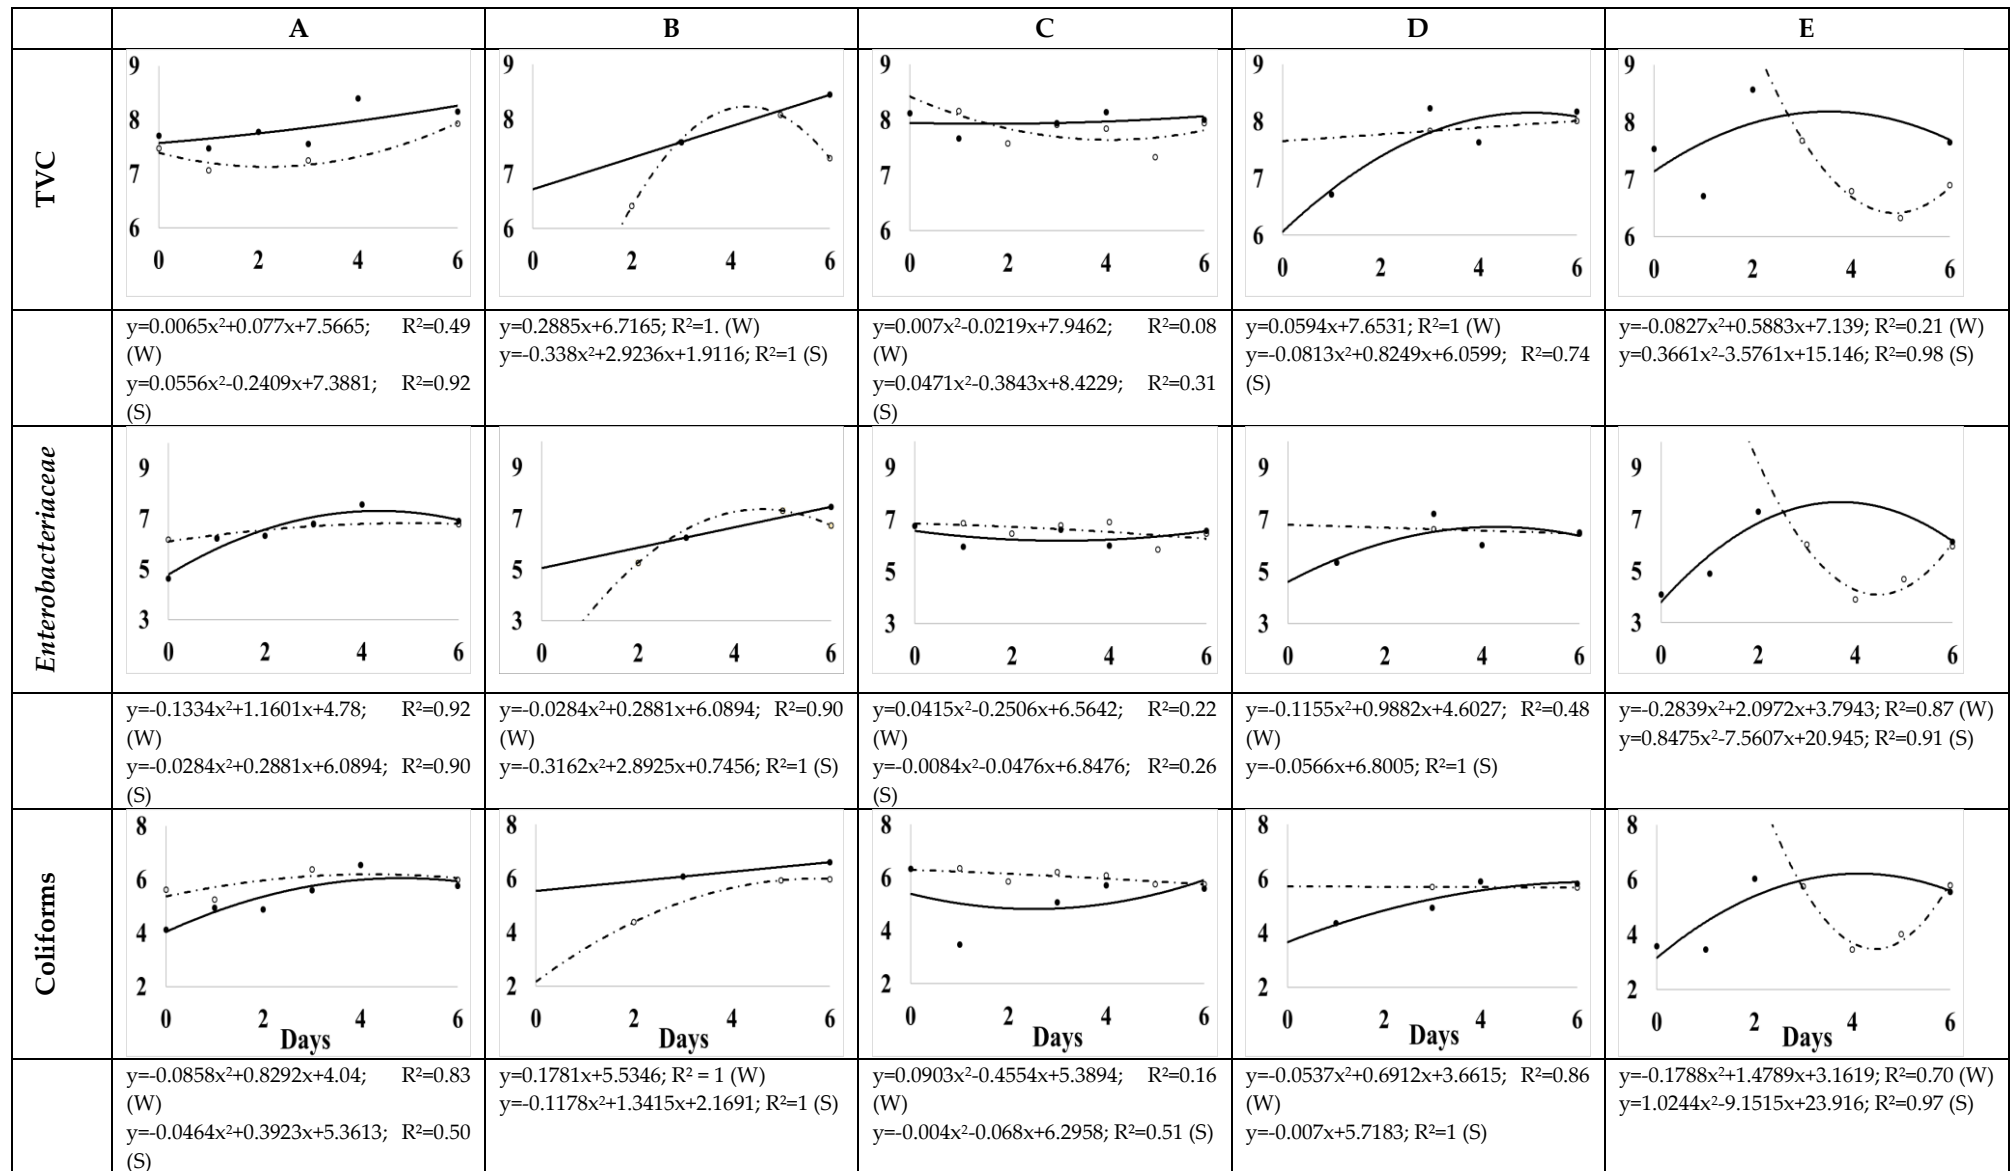

**Figure S1.** Effects of shelf life (days) on microbiological quality (log cfu/g) per salad producer during winter (●, W) and summer (○, S). A: producer A, B: producer B, C: producer C, D: producer D, E: producer E.

|                            | A                                                                                             | B                                                                                   | C                                                                                              | D                                                                                    | E                                                                                    |
|----------------------------|-----------------------------------------------------------------------------------------------|-------------------------------------------------------------------------------------|------------------------------------------------------------------------------------------------|--------------------------------------------------------------------------------------|--------------------------------------------------------------------------------------|
| <i>E. coli</i>             | 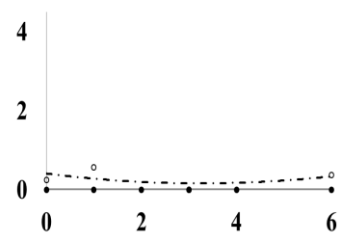             |   |             |   |   |
|                            | $y=0.0234x^2-0.1522x+0.4085$ ; $R^2=0.19$ (W)<br>$y=0$ ; $R^2=\#N/A$ (S)                      | $y=0$ ; $R^2=\#N/A$ (W)<br>$y=0$ ; $R^2=\#N/A$ (S)                                  | $y=0$ ; $R^2=\#N/A$ (W)<br>$y=0.1055x^2-0.8132x+1.7684$ ; $R^2=0.57$ (S)                       | $y=0.0804x^2-0.748x+1.6134$ ; $R^2=0.97$ (W)<br>$y=-0.8138x+4.8829$ ; $R^2=1$ (S)    | $y=0$ ; $R^2=\#N/A$ (W)<br>$y=0$ ; $R^2=\#N/A$ (S)                                   |
| <i>Staphylococcus spp.</i> |              |   |             |   |   |
|                            | $y=0.1439x^2-0.9699x+1.7015$ ; $R^2=0.87$ (W)<br>$y=0.092x^2-0.3665x+0.7854$ ; $R^2=0.48$ (S) | $y=-1.5004x+9.0026$ ; $R^2=1$ (W)<br>$y=-1.033x^2+8.8877x-13.643$ ; $R^2=1$ (S)     | $y=-0.2039x^2+1.526x+0.1156$ ; $R^2=0.25$ (W)<br>$y=-0.2684x^2+2.1064x-1.141$ ; $R^2=0.53$ (S) | $y=-0.2909x^2+2.3877x-2.5049$ ; $R^2=0.35$ (W)<br>$y=0.0012x+2.6067$ ; $R^2=1$ (S)   | $y=0$ ; $R^2=\#N/A$ (W)<br>$y=0$ ; $R^2=\#N/A$ (S)                                   |
| <i>B. cereus</i>           |             |  |            |  |  |
|                            | $y=0.037x^2-0.2927x+0.4775$ ; $R^2=0.72$ (W)<br>$y=0.0336x^2-0.2648x+0.3991$ ; $R^2=0.75$ (S) | $y=0$ ; $R^2=\#N/A$ (W)<br>$y=0$ ; $R^2=\#N/A$ (S)                                  | $y=0$ ; $R^2=\#N/A$ (W)<br>$y=-0.0975x^2+0.7434x-0.5562$ ; $R^2=0.22$ (S)                      | $y=0$ ; $R^2=\#N/A$ (W)<br>$y=0$ ; $R^2=\#N/A$ (S)                                   | $y=0$ ; $R^2=\#N/A$ (W)<br>$y=0$ ; $R^2=\#N/A$ (S)                                   |

Figure S1. (Continued)

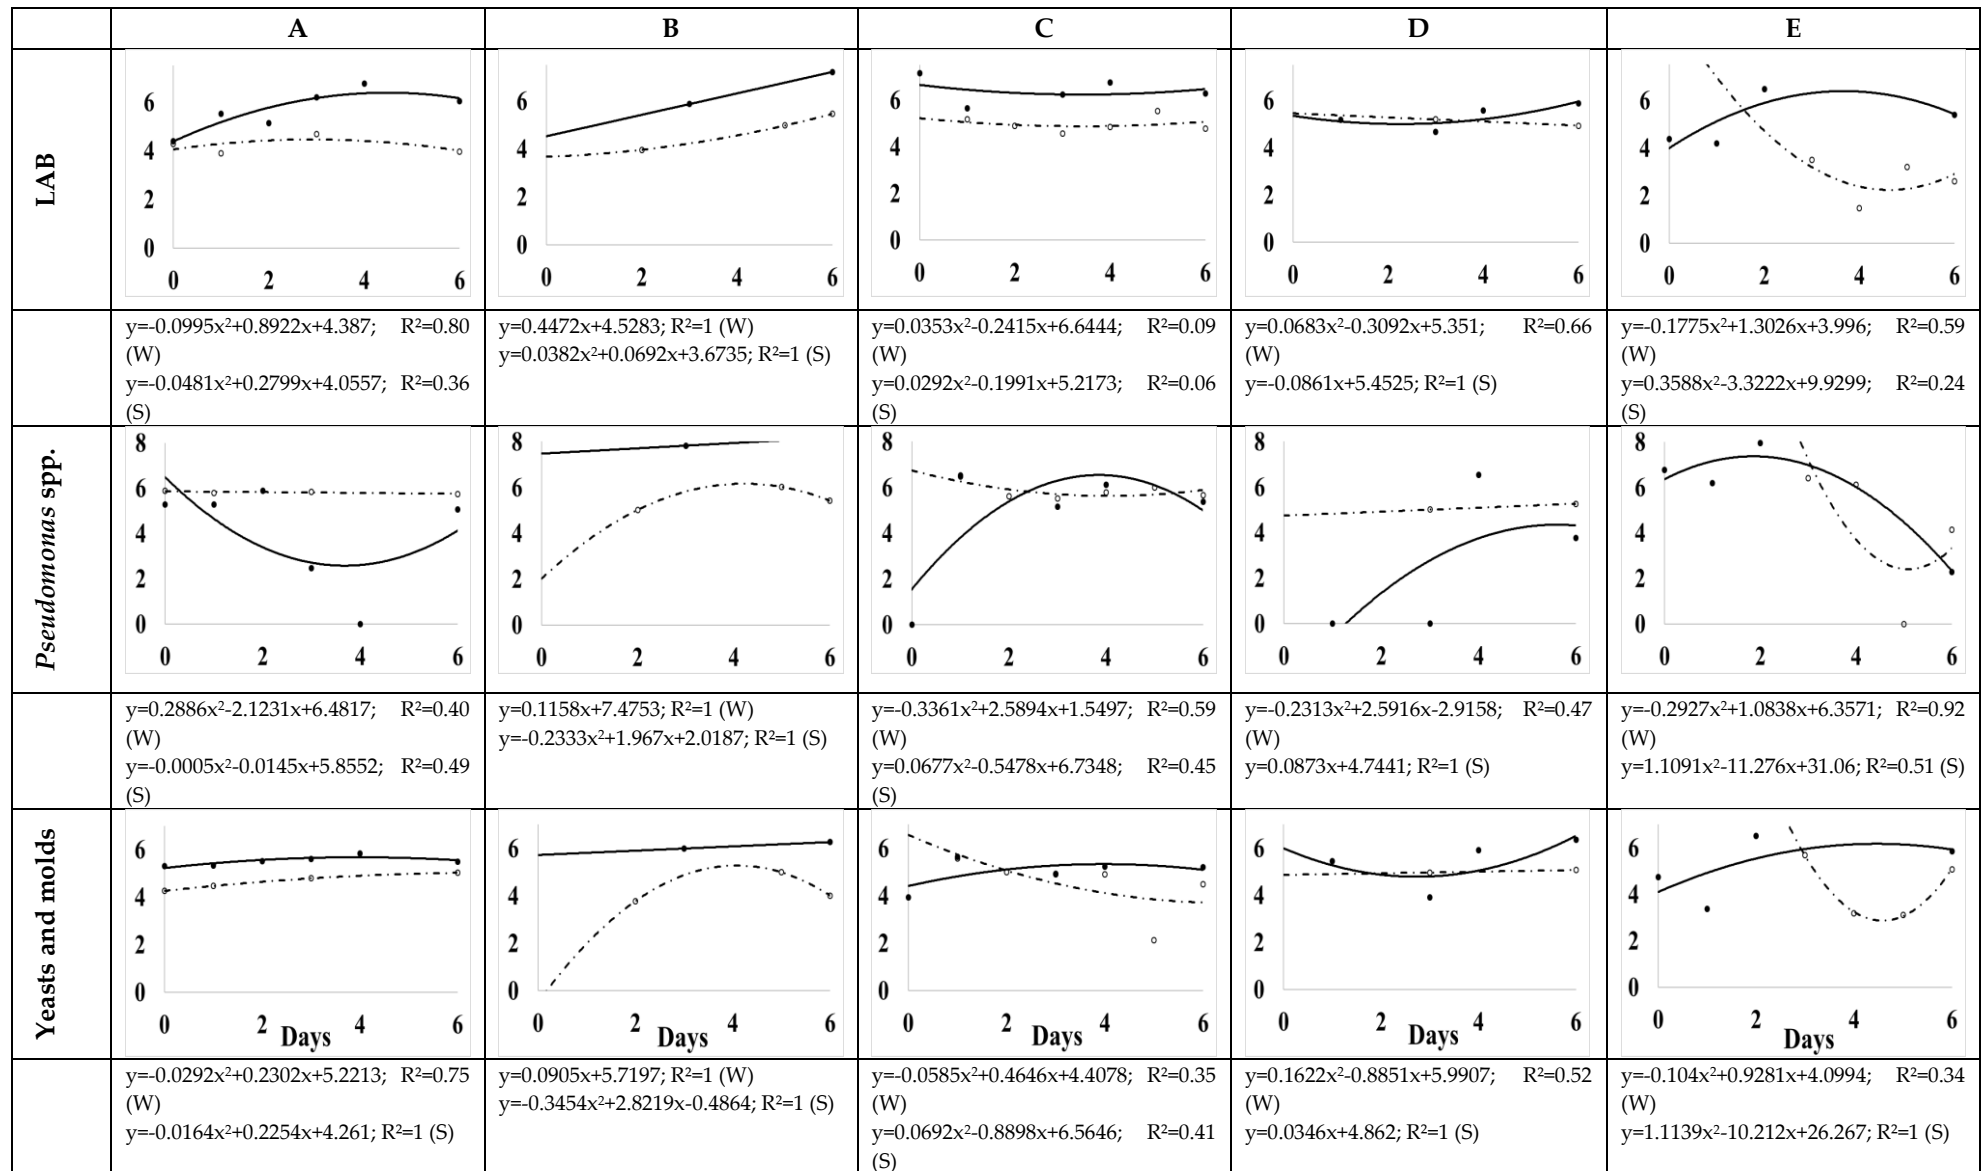

Figure S1. (Continued)

|                              | TVC                                                                                 |                                                                                                        | <i>Enterobacteriaceae</i>                                                            |                                                                                                        |
|------------------------------|-------------------------------------------------------------------------------------|--------------------------------------------------------------------------------------------------------|--------------------------------------------------------------------------------------|--------------------------------------------------------------------------------------------------------|
| Lettuce                      | 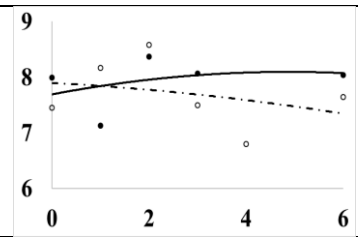   | $y=-0.0171x^2+0.1662x+7.6891$ ;<br>$R^2=0.11$ (W)<br>$y=-0.0076x^2-0.0462x+7.8942$ ;<br>$R^2=0.11$ (S) |    | $y=-0.1492x^2+1.1711x+4.9355$ ;<br>$R^2=0.74$ (W)<br>$y=-0.0773x^2-0.5979x+6.7124$ ;<br>$R^2=0.16$ (S) |
| Lettuce+Cabbage              |    | $y=-0.0173x^2+0.044x+8.0999$ ;<br>$R^2=0.68$ (W)<br>$y=0.0551x^2-0.6416x+9.2347$ ;<br>$R^2=0.23$ (S)   |    | $y=0.0443x^2-0.4x+6.7485$ ;<br>$R^2=0.94$ (W)<br>$y=-0.1674x^2+1.0666x+4.8716$ ;<br>$R^2=0.67$ (S)     |
| Lettuce+Endive/<br>radicchio |    | $y=0.0694x^2-0.4229x+8.156$ ;<br>$R^2=0.68$ (W)<br>$y=-0.0287x^2+0.5487x+5.8757$ ;<br>$R^2=0.86$ (S)   |    | $y=0.032x^2-0.0589x+6.4607$ ;<br>$R^2=0.99$ (W)<br>$y=-0.1721x^2+1.7325x+2.9305$ ;<br>$R^2=0.95$ (S)   |
| Lettuce+Rocket               |   | $y=0.1238x+7.5249$ ; $R^2=1$ (W)<br>$y=0.2062x^2-1.4092x+9.4822$ ;<br>$R^2=1$ (S)                      |   | $y=0.1095x+6.7699$ ; $R^2=1$ (W)<br>$y=0.0369x^2-0.147x+6.4949$ ;<br>$R^2=1$ (S)                       |
| Lettuce+Chives               |  | $y=-0.0787x^2+0.7739x+6.528$ ;<br>$R^2=1$ (W)<br>$y=-0.0951x^2+1.0385x+5.4959$ ;<br>$R^2=1$ (S)        |  | $y=-0.162x^2+1.4662x+3.9996$ ;<br>$R^2=1$ (W)<br>$y=-0.0821x^2+0.813x+5.2556$ ;<br>$R^2=1$ (S)         |
| Rocket                       |  | $y=0.0384x^2-0.1831x+7.5846$ ;<br>$R^2=1$ (W)<br>$y=-0.0633x^2+0.4044x+7.0396$ ;<br>$R^2=0.24$ (S)     |  | $y=-0.3829x^2+2.5829x+4.8686$ ;<br>$R^2=1$ (W)<br>$y=0.0438x^2-0.5241x+7.567$ ;<br>$R^2=0.54$ (S)      |
| Other                        |  | $y=0.0091x^2+0.1099x+7.2934$ ;<br>$R^2=0.85$ (W)<br>$y=-0.0851x^2+0.542x+7.487$ ; $R^2=1$ (S)          |  | $y=-0.1626x^2+1.4405x+3.8483$ ;<br>$R^2=0.89$ (W)<br>$y=-0.0982x^2+0.6176x+6.3752$ ;<br>$R^2=1$ (S)    |

Figure S2. Effects of shelf life (days) on microbiological quality (log cfu/g) per type of salad during winter (●, W) and summer (○, S). Other= Lettuce +2 or more ingredients.

|                              | Coliforms |                                                                                                                 | <i>E. coli</i> |                                                                                       |
|------------------------------|-----------|-----------------------------------------------------------------------------------------------------------------|----------------|---------------------------------------------------------------------------------------|
| Lettuce                      |           | $y = -0.0488x^2 + 0.5507x + 4.3534$ ; $R^2 = 0.35$ (W)<br>$y = 0.0887x^2 - 0.616x + 5.9244$ ; $R^2 = 0.17$ (S)  |                | $y = 0$ ; $R^2 = \#N/A$ (W)<br>$y = -0.1072x^2 + 0.375x + 1.3835$ ; $R^2 = 0.18$ (S)  |
| Lettuce+Cabbage              |           | $y = 0.1246x^2 - 0.9223x + 6.1855$ ; $R^2 = 0.40$ (W)<br>$y = -0.1024x^2 + 0.4542x + 5.7427$ ; $R^2 = 0.96$ (S) |                | $y = 0$ ; $R^2 = \#N/A$ (W)<br>$y = 0.1552x^2 - 1.2109x + 2.2665$ ; $R^2 = 0.93$ (S)  |
| Lettuce+Endive/<br>radicchio |           | $y = -0.033x^2 + 0.4141x + 4.746$ ; $R^2 = 0.65$ (W)<br>$y = -0.0866x^2 + 0.9227x + 3.688$ ; $R^2 = 0.60$ (S)   |                | $y = 0$ ; $R^2 = \#N/A$ (W)<br>$y = 0.0188x^2 - 0.1017x + 0.1055$ ; $R^2 = 0.78$ (S)  |
| Lettuce+Rocket               |           | $y = 0.4471x + 3.3337$ ; $R^2 = 1$ (W)<br>$y = -0.022x^2 + 0.26x + 5.4533$ ; $R^2 = 1$ (S)                      |                | $y = 0$ ; $R^2 = \#N/A$ (W)<br>$y = 0.2003x^2 + 1.9402x - 3.0792$ ; $R^2 = 1$ (S)     |
| Lettuce+Chives               |           | $y = -0.1053x^2 + 0.9517x + 4.0176$ ; $R^2 = 1$ (W)<br>$y = 0.0337x^2 - 0.1546x + 6.1008$ ; $R^2 = 1$ (S)       |                | $y = 0$ ; $R^2 = \#N/A$ (W)<br>$y = -0.2915x^2 + 2.4877x - 3.8093$ ; $R^2 = 1$ (S)    |
| Rocket                       |           | $y = -0.2648x^2 + 1.7995x + 4.2344$ ; $R^2 = 1$ (W)<br>$y = -0.0528x^2 + 0.3472x + 5.2809$ ; $R^2 = 0.11$ (S)   |                | $y = 0$ ; $R^2 = \#N/A$ (W)<br>$y = 0.1387x^2 - 1.0267x + 1.7657$ ; $R^2 = 0.97$ (S)  |
| Other                        |           | $y = -0.0902x^2 + 1.0194x + 3.0019$ ; $R^2 = 0.74$ (W)<br>$y = -0.1018x^2 + 0.5537x + 6.1195$ ; $R^2 = 1$ (S)   |                | $y = -0.0069x^2 - 0.0027x + 0.2138$ ; $R^2 = 0.15$ (W)<br>$y = 0$ ; $R^2 = \#N/A$ (S) |

Figure S2. (Continued)

|                              | <i>Staphylococcus</i> spp. |                                                                                                       | <i>B. cereus</i> |                                                                                                  |
|------------------------------|----------------------------|-------------------------------------------------------------------------------------------------------|------------------|--------------------------------------------------------------------------------------------------|
| Lettuce                      |                            | $y=0.001x^2+0.0445x+0.4313$ ;<br>$R^2=0.04$ (W)<br>$y=-0.0193x^2+0.1536x+0.7927$ ;<br>$R^2=0.01$ (S)  |                  | $y=0$ ; $R^2=\#N/A$ (W)<br>$y=0$ ; $R^2=\#N/A$ (S)                                               |
| Lettuce+Cabbage              |                            | $y=-0.1574x^2+1.4217x-0.3165$ ;<br>$R^2=0.31$ (W)<br>$y=1.1715x^2-11.5x+29.333$ ;<br>$R^2=0.78$ (S)   |                  | $y=0$ ; $R^2=\#N/A$ (W)<br>$y=0$ ; $R^2=\#N/A$ (S)                                               |
| Lettuce+Endive/<br>radicchio |                            | $y=-0.2031x^2+1.4797x-1.5253$ ;<br>$R^2=0.63$ (W)<br>$y=-0.0892x^2+1.5092x-2.013$ ;<br>$R^2=0.73$ (S) |                  | $y=0$ ; $R^2=\#N/A$ (W)<br>$y=0$ ; $R^2=\#N/A$ (S)                                               |
| Lettuce+Rocket               |                            | $y=0$ ; $R^2=\#N/A$ (W)<br>$y=0.7558x^2-6.4166x+13.574$ ;<br>$R^2=1$ (S)                              |                  | $y=0$ ; $R^2=\#N/A$ (W)<br>$y=0$ ; $R^2=\#N/A$ (S)                                               |
| Lettuce+Chives               |                            | $y=0$ ; $R^2=\#N/A$ (W)<br>$y=-0.3182x^2+2.9032x-2.9059$ ;<br>$R^2=1$ (S)                             |                  | $y=0$ ; $R^2=\#N/A$ (W)<br>$y=0$ ; $R^2=\#N/A$ (S)                                               |
| Rocket                       |                            | $y=0.5686x^2-3.483x+4.3915$ ;<br>$R^2=1$ (W)<br>$y=0.227x^2-1.6362x+3.4025$ ;<br>$R^2=0.56$ (S)       |                  | $y=0$ ; $R^2=\#N/A$ (W)<br>$y=-0.429x^2+3.0461x-2.5144$ ;<br>$R^2=0.91$ (S)                      |
| Other                        |                            | $y=-0.081x^2+0.7081x-0.0717$ ;<br>$R^2=0.45$ (W)<br>$y=-0.5075x^2+3.2626x+2E^{-15}$ ;<br>$R^2=1$ (S)  |                  | $y=0.1051x^2-0.8118x+1.223$ ;<br>$R^2=0.73$ (W)<br>$y=0.0547x^2-0.4924x+0.9847$ ;<br>$R^2=1$ (S) |

Figure S2. (Continued)

|                              | LAB                                                                                 |                                                                                                                  | <i>Pseudomonas</i> spp.                                                              |                                                                                                               |
|------------------------------|-------------------------------------------------------------------------------------|------------------------------------------------------------------------------------------------------------------|--------------------------------------------------------------------------------------|---------------------------------------------------------------------------------------------------------------|
| Lettuce                      | 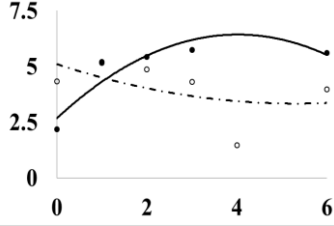   | $y = -0.2322x^2 + 1.866x + 2.6786$ ; $R^2 = 0.86$ (W)<br>$y = 0.0623x^2 - 0.664x + 5.1021$ ; $R^2 = 0.26$ (S)    |    | $y = 0.1992x^2 - 1.3614x + 6.349$ ; $R^2 = 0.53$ (W)<br>$y = 0.0031x^2 - 0.0558x + 6.1063$ ; $R^2 = 0.09$ (S) |
| Lettuce+Cabbage              |    | $y = -0.0424x^2 + 0.0989x + 7.1523$ ; $R^2 = 0.94$ (W)<br>$y = -0.5107x^2 + 4.8365x - 5.8641$ ; $R^2 = 0.69$ (S) |    | $y = -0.1758x^2 + 1.5512x - 0.3412$ ; $R^2 = 0.30$ (W)<br>$y = -0.3288x^2 + 3.2399x - 1.9806$ ; $R^2 = 1$ (S) |
| Lettuce+Endive/<br>radicchio |    | $y = -0.0033x^2 + 0.2039x + 5.3372$ ; $R^2 = 0.87$ (W)<br>$y = 0.0363x^2 - 0.1287x + 4.5623$ ; $R^2 = 0.47$ (S)  |    | $y = 1.3629x^2 - 8.6419x + 14.44$ ; $R^2 = 1$ (W)<br>$y = -0.0151x^2 + 0.1444x + 5.3624$ ; $R^2 = 0.05$ (S)   |
| Lettuce+Rocket               |   | $y = 0.1683x^2 + 5.3637$ ; $R^2 = 1$ (W)<br>$y = 0.1141x^2 - 1.0079x + 6.6222$ ; $R^2 = 1$ (S)                   |   | $y = 0.257x^2 + 6.5674$ ; $R^2 = 1$ (W)<br>$y = 0.0403x^2 + 5.6089$ ; $R^2 = 1$ (S)                           |
| Lettuce+Chives               |  | $y = -0.1606x^2 - 1.0342x + 6.9583$ ; $R^2 = 1$ (W)<br>$y = -0.1315x^2 + 1.1643x + 2.8709$ ; $R^2 = 1$ (S)       |  | $y = -0.1964x^2 + 0.5984x + 7.6855$ ; $R^2 = 1$ (W)<br>$y = -0.1568x^2 + 1.2492x + 3.5068$ ; $R^2 = 1$ (S)    |
| Rocket                       |  | $y = 0.1411x^2 - 0.8001x + 5.7196$ ; $R^2 = 1$ (W)<br>$y = -0.1287x^2 + 0.9638x + 2.7154$ ; $R^2 = 0.86$ (S)     |  | $y = 0.0087x^2 - 0.0773x + 6.1577$ ; $R^2 = 1$ (W)<br>$y = 0.0101x^2 - 0.4904x + 6.5128$ ; $R^2 = 0.46$ (S)   |
| Other                        |  | $y = 0.0088x^2 + 0.1287x + 5.0841$ ; $R^2 = 0.67$ (W)<br>$y = -0.1584x^2 + 0.8017x + 4.2979$ ; $R^2 = 1$ (S)     |  | $y = -0.0961x^2 + 0.7417x + 3.1075$ ; $R^2 = 0.10$ (W)<br>$y = 0.0849x^2 - 0.531x + 5.8563$ ; $R^2 = 1$ (S)   |

Figure S2. (Continued)



| Yeasts and molds             |                                                                                     |                                                                                                |
|------------------------------|-------------------------------------------------------------------------------------|------------------------------------------------------------------------------------------------|
| Lettuce                      | 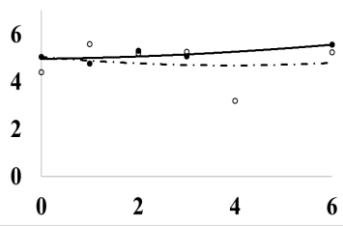   | $y=0.0124x^2+0.0256x+4.9565$ ; $R^2=0.63$ (W)<br>$y=0.0237x^2-0.1847x+5.0409$ ; $R^2=0.02$ (S) |
| Lettuce+Cabbage              |    | $y=-0.0007x^2+0.194x+3.8681$ ; $R^2=0.51$ (W)<br>$y=0.6957x^2-7.3694x+21.318$ ; $R^2=0.51$ (S) |
| Lettuce+Endive/<br>radicchio |    | $y=-0.0577x^2+0.5543x+4.7211$ ; $R^2=0.70$ (W)<br>$y=-0.1x^2+0.9909x+2.5704$ ; $R^2=0.87$ (S)  |
| Lettuce+Rocket               |   | $y=0.0058x+6.1365$ ; $R^2=1$ (W)<br>$y=0.1393x^2-0.9671x+6.028$ ; $R^2=1$ (S)                  |
| Lettuce+Chives               |  | $y=0.0954x^2-0.754x+6.5341$ ; $R^2=1$ (W)<br>$y=-0.0437x^2+0.3338x+4.9392$ ; $R^2=1$ (S)       |
| Rocket                       |  | $y=0.0207x^2-0.104x+5.1068$ ; $R^2=1$ (W)<br>$y=0.1108x^2-0.8521x+5.7727$ ; $R^2=0.39$ (S)     |
| Other                        |  | $y=-0.0179x^2+0.1653x+5.3446$ ; $R^2=0.47$ (W)<br>$y=-0.0901x^2+0.5886x+4.1232$ ; $R^2=1$ (S)  |

Figure S2. (Continued)

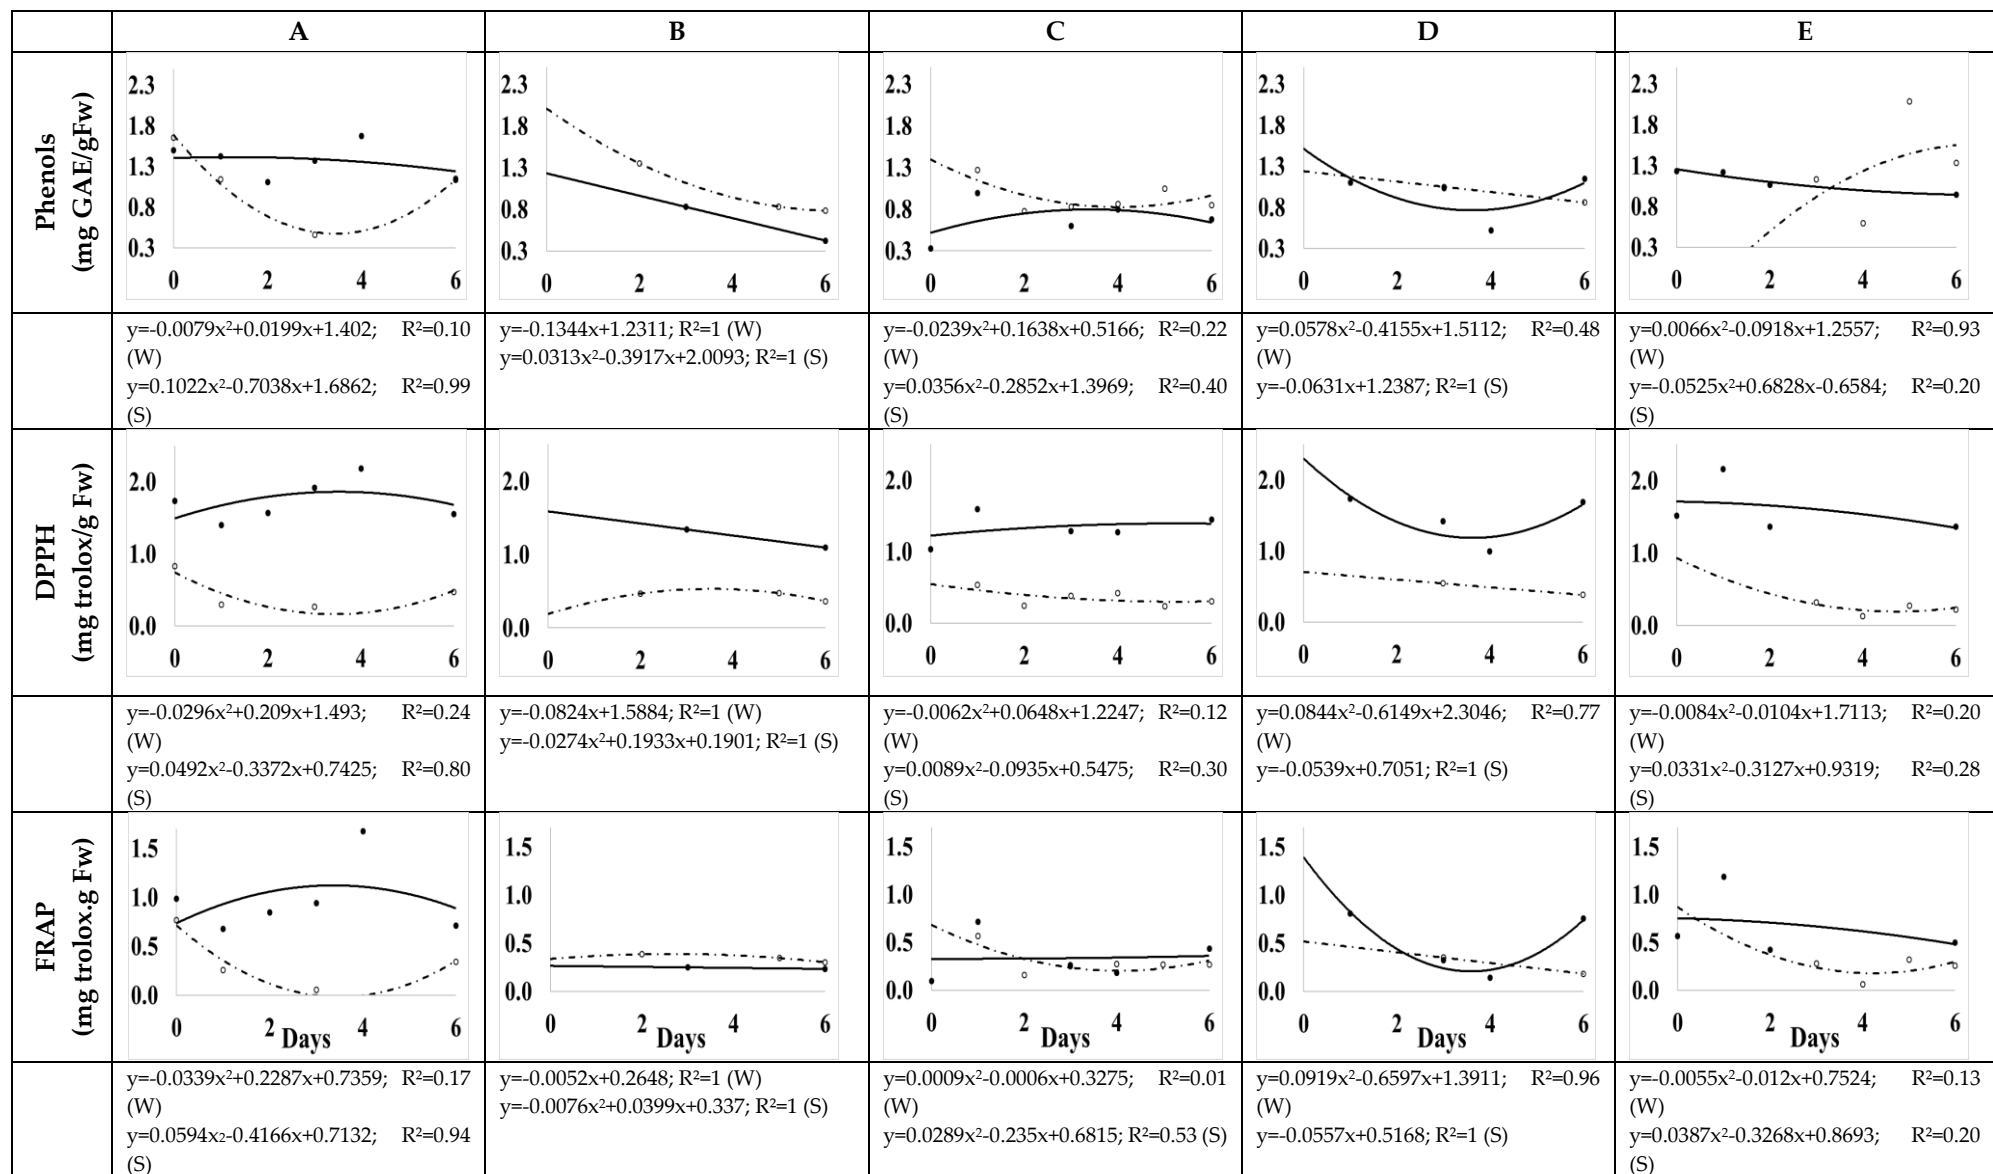

**Figure S3.** Effects of shelf life (days) on total phenolic content, antioxidants, % CO<sub>2</sub> and damage index (H<sub>2</sub>O<sub>2</sub> and lipid peroxidation) per salad producer during winter (●, W) and summer (○, S). A: producer A, B: producer B, C: producer C, D: producer D, E: producer E.

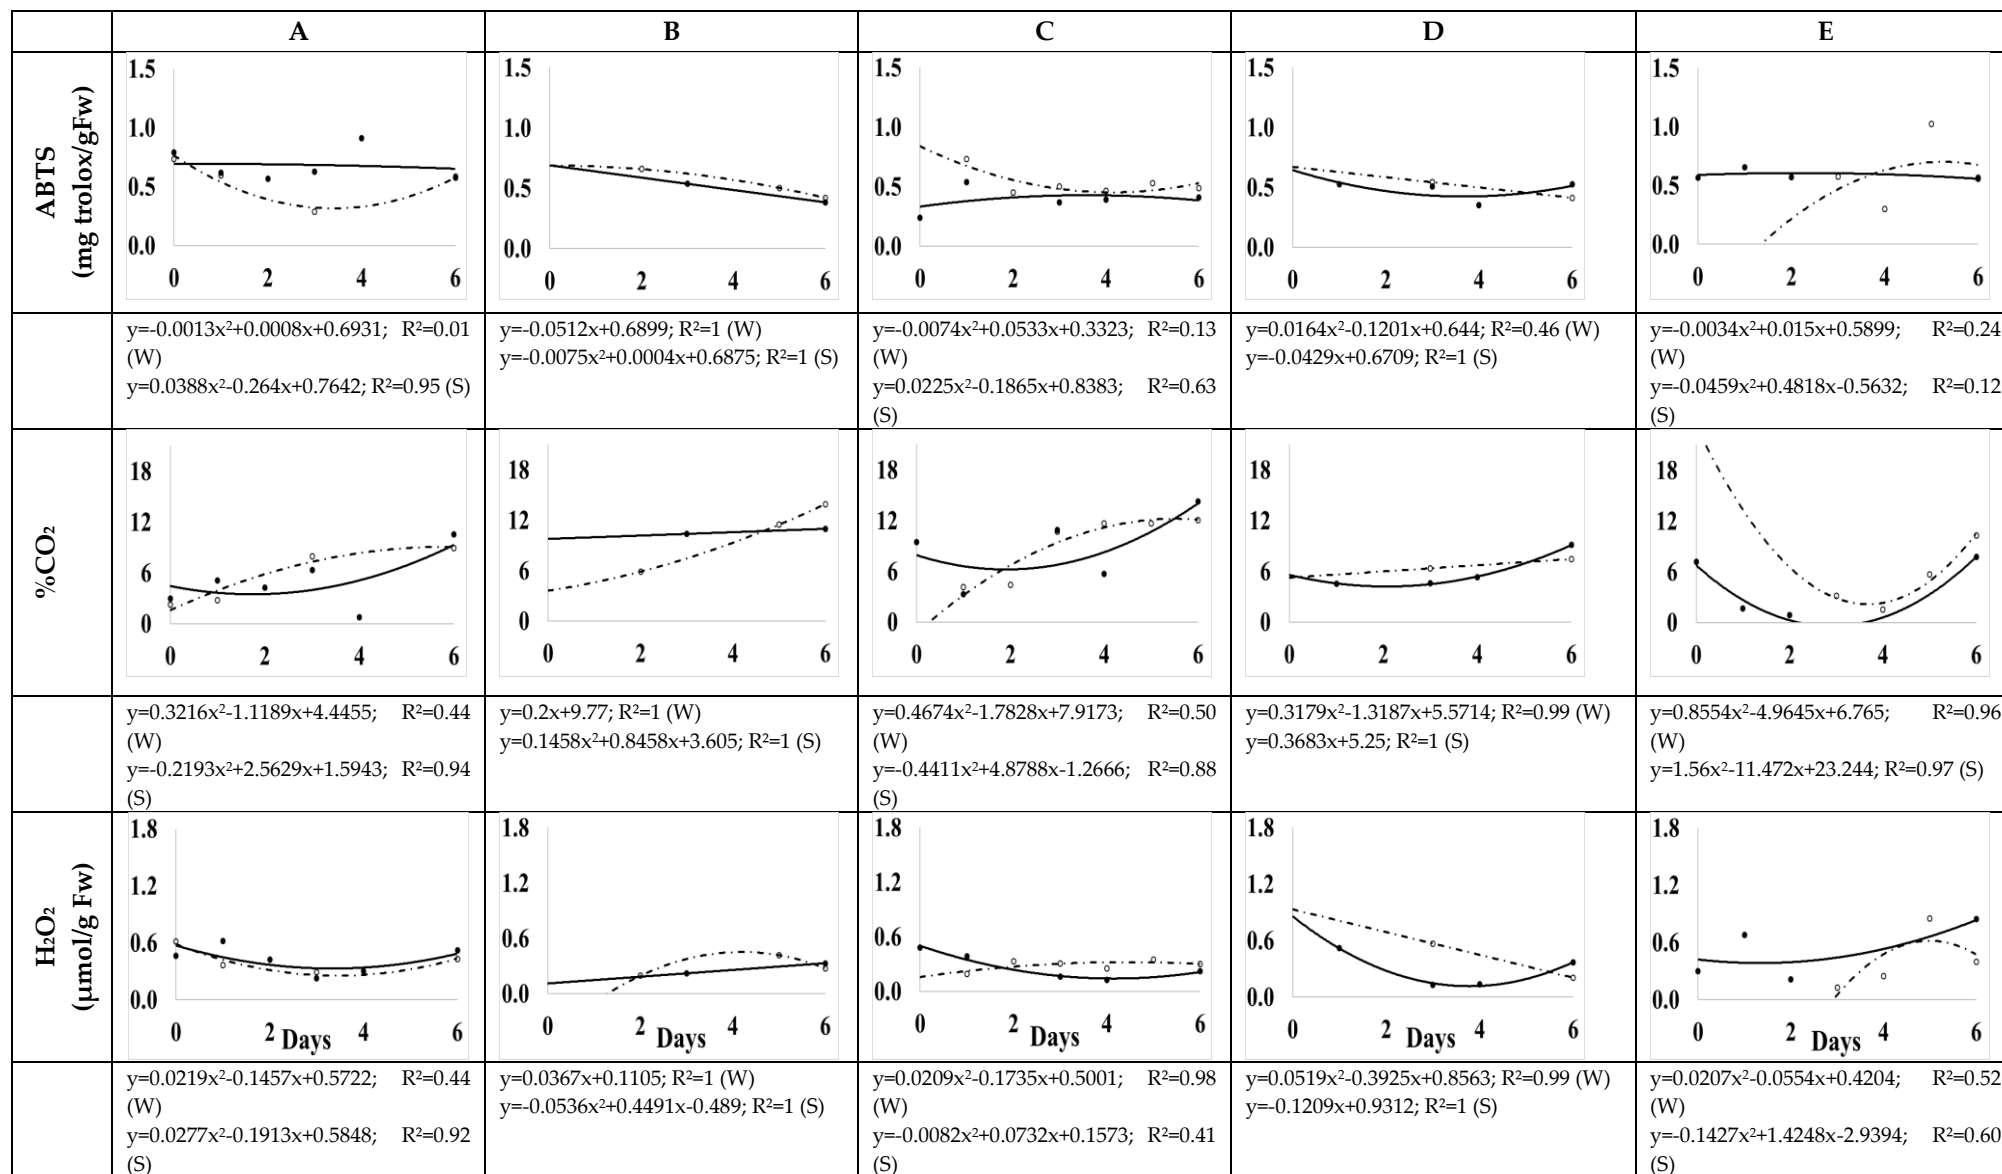

Figure S3. (Continued)

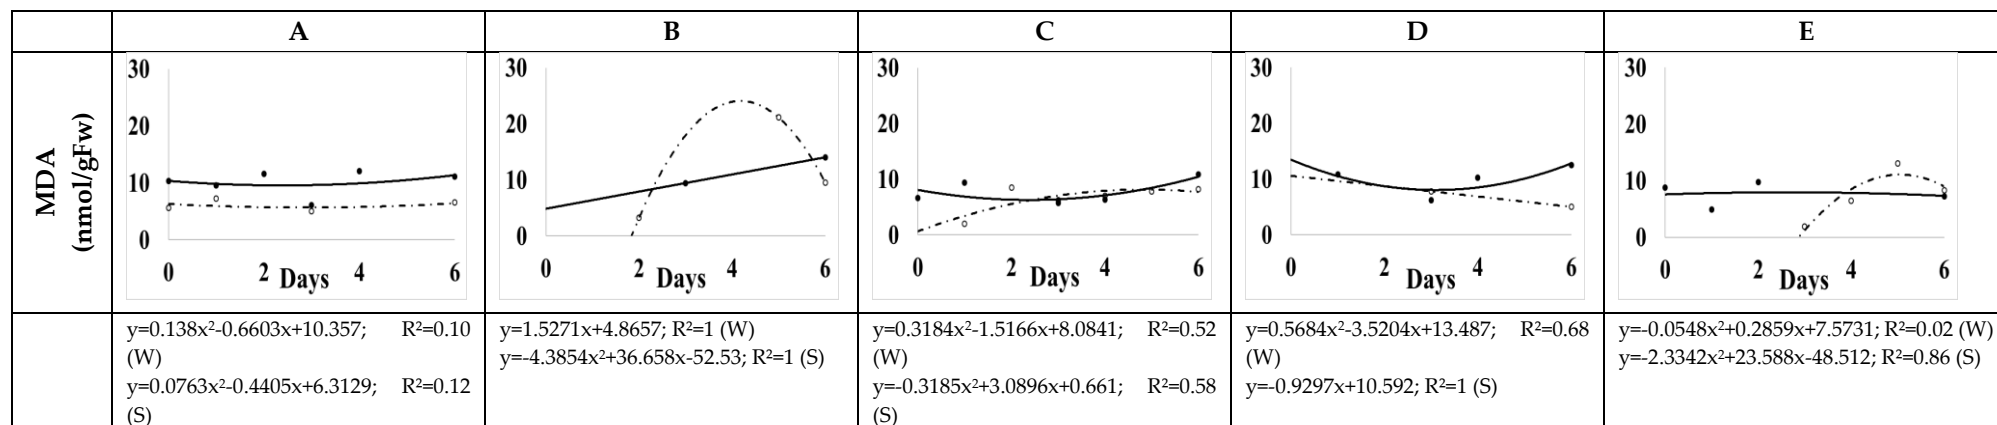

Figure S3. (Continued)

|                              | Phenols (mg GAE/g Fw)                                                               |                                                                                                        | DPPH (mg trolox/g Fw)                                                                |                                                                                                        |
|------------------------------|-------------------------------------------------------------------------------------|--------------------------------------------------------------------------------------------------------|--------------------------------------------------------------------------------------|--------------------------------------------------------------------------------------------------------|
| Lettuce                      | 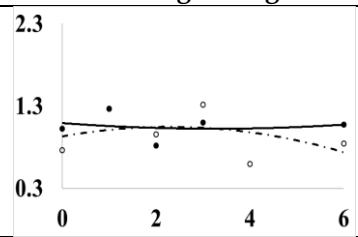   | $y=0.0065x^2-0.0423x+1.0913$ ;<br>$R^2=0.03$ (W)<br>$y=-0.0223x^2+0.102x+0.9298$ ;<br>$R^2=0.16$ (S)   |    | $y=0.0052x^2-0.029x+1.627$ ;<br>$R^2=0.01$ (W)<br>$y=-0.0114x^2+0.0425x+0.4112$ ;<br>$R^2=0.18$ (S)    |
| Lettuce+Cabbage              |    | $y=-0.0124x^2+0.1405x+0.3164$ ;<br>$R^2=0.80$ (W)<br>$y=0.0107x^2-0.1155x+1.1422$ ;<br>$R^2=0.86$ (S)  |    | $y=-0.0006x^2+0.0772x+1.0464$ ;<br>$R^2=0.92$ (W)<br>$y=0.069x^2-0.725x+2.176$ ;<br>$R^2=0.74$ (S)     |
| Lettuce+Endive/<br>radicchio |    | $y=-0.0768x^2+0.5493x+0.0607$ ;<br>$R^2=0.70$ (W)<br>$y=-0.0103x^2+0.0389x+0.8188$ ;<br>$R^2=0.05$ (S) |    | $y=-0.0908x^2+0.6788x+0.4219$ ;<br>$R^2=0.68$ (W)<br>$y=-0.0119x^2+0.0892x+0.2263$ ;<br>$R^2=0.09$ (S) |
| Lettuce+Rocket               |   | $y=-0.0118x+0.8886$ ; $R^2=1$ (W)<br>$y=-0.065x^2+0.5247x-0.0264$ ;<br>$R^2=1$ (S)                     |   | $y=-0.0195x+1.5045$ ; $R^2=1$ (W)<br>$y=0.0176x^2-0.1226x+0.4163$ ;<br>$R^2=1$ (S)                     |
| Lettuce+Chives               |  | $y=0.0069x^2-0.0902x+0.7068$ ;<br>$R^2=1$ (W)<br>$y=0.0398x^2-0.2518x+1.0533$ ;<br>$R^2=1$ (S)         |  | $y=0.0258x^2-0.2446x+1.6177$ ;<br>$R^2=1$ (W)<br>$y=-0.0571x^2+0.512x-0.6877$ ;<br>$R^2=1$ (S)         |
| Rocket                       |  | $y=-0.1945x^2+1.2065x+1.4263$ ;<br>$R^2=1$ (W)<br>$y=0.034x^2-0.1682x+1.4739$ ;<br>$R^2=0.59$ (S)      |  | $y=-0.0246x^2+0.1539x+1.3441$ ;<br>$R^2=1$ (W)<br>$y=-0.0065x^2+0.0426x+0.2732$ ;<br>$R^2=0.37$ (S)    |
| Other                        |  | $y=0.0261x^2-0.2582x+1.8655$ ;<br>$R^2=0.61$ (W)<br>$y=0.1558x^2-1.1159x+2.5471$ ;<br>$R^2=1$ (S)      |  | $y=0.0366x^2-0.2805x+2.1235$ ;<br>$R^2=0.35$ (W)<br>$y=0.0863x^2-0.6234x+1.3442$ ;<br>$R^2=1$ (S)      |

Figure S4. Effects of shelf life (days) on total phenolic content, antioxidants, % CO<sub>2</sub> and damage index (H<sub>2</sub>O<sub>2</sub> and lipid peroxidation) per type of salad during winter (●, W) and summer (○, S). Other= Lettuce +2 or more ingredients.

|                              | FRAP (mg trolox/g Fw)                                                               |                                                                                                        | ABTS (mg trolox/g Fw)                                                                |                                                                                                        |
|------------------------------|-------------------------------------------------------------------------------------|--------------------------------------------------------------------------------------------------------|--------------------------------------------------------------------------------------|--------------------------------------------------------------------------------------------------------|
| Lettuce                      | 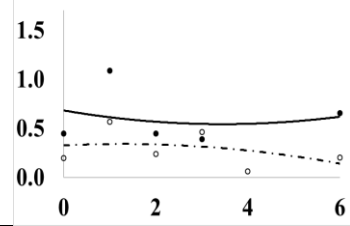   | $y=0.0117x^2-0.081x+0.6813$ ;<br>$R^2=0.03$ (W)<br>$y=-0.0089x^2+0.0229x+0.3248$ ;<br>$R^2=0.16$ (S)   |    | $y=0.003x^2-0.0191x+0.556$ ;<br>$R^2=0.03$ (W)<br>$y=-0.009x^2+0.038x+0.5028$ ;<br>$R^2=0.10$ (S)      |
| Lettuce+Cabbage              |    | $y=0.0047x^2+0.0384x+0.1125$ ;<br>$R^2=0.63$ (W)<br>$y=0.0665x^2-0.6659x+1.8917$ ;<br>$R^2=0.90$ (S)   |    | $y=-0.0021x^2+0.0512x+0.2427$ ;<br>$R^2=0.97$ (W)<br>$y=0.0369x^2-0.3787x+1.4153$ ;<br>$R^2=0.93$ (S)  |
| Lettuce+Endive/<br>radicchio |    | $y=-0.0726x^2+0.5335x-0.3188$ ;<br>$R^2=0.51$ (W)<br>$y=-0.0127x^2+0.0957x+0.0703$ ;<br>$R^2=0.06$ (S) |    | $y=-0.0297x^2+0.2198x+0.1248$ ;<br>$R^2=0.59$ (W)<br>$y=-0.0137x^2+0.0911x+0.3209$ ;<br>$R^2=0.06$ (S) |
| Lettuce+Rocket               |   | $y=-0.058x+0.7313$ ; $R^2=1$ (W)<br>$y=0.0157x^2-0.0806x+0.2513$ ;<br>$R^2=1$ (S)                      |   | $y=0.0035x+0.4435$ ; $R^2=1$ (W)<br>$y=0.0068x^2-0.0444x+0.5253$ ;<br>$R^2=1$ (S)                      |
| Lettuce+Chives               |  | $y=0.0151x^2-0.1328x+0.4173$ ;<br>$R^2=1$ (W)<br>$y=0.0086x^2-0.028x+0.1488$ ;<br>$R^2=1$ (S)          |  | $y=0.0079x^2-0.0808x+0.4998$ ;<br>$R^2=1$ (W)<br>$y=0.0111x^2-0.0435x+0.4516$ ;<br>$R^2=1$ (S)         |
| Rocket                       |  | $y=0.0124x^2-0.057x+0.8376$ ;<br>$R^2=1$ (W)<br>$y=0.0112x^2-0.0713x+0.3847$ ;<br>$R^2=0.73$ (S)       |  | $y=0.0055x^2-0.0292x+0.8033$ ;<br>$R^2=1$ (W)<br>$y=0.0068x^2-0.0421x+0.7462$ ;<br>$R^2=0.09$ (S)      |
| Other                        |  | $y=-0.0027x^2-0.0536x+1.3158$ ;<br>$R^2=0.19$ (W)<br>$y=0.1012x^2-0.7333x+1.3412$ ;<br>$R^2=1$ (S)     |  | $y=0.0068x^2-0.0861x+0.8792$ ;<br>$R^2=0.52$ (W)<br>$y=0.0632x^2-0.4371x+1.0823$ ;<br>$R^2=1$ (S)      |

Figure S4. (Continued)

|                              | %CO <sub>2</sub> |                                                                                                       | H <sub>2</sub> O <sub>2</sub> (μmol/g Fw) |                                                                                                      |
|------------------------------|------------------|-------------------------------------------------------------------------------------------------------|-------------------------------------------|------------------------------------------------------------------------------------------------------|
| Lettuce                      |                  | $y=0.3193x^2-1.293x+4.274$ ;<br>$R^2=0.90$ (W)<br>$y=0.1421x^2-0.203x+2.9354$ ;<br>$R^2=0.36$ (S)     |                                           | $y=0.0292x^2-0.1805x+0.5055$ ;<br>$R^2=0.38$ (W)<br>$y=0.0048x^2-0.0596x+0.4689$ ;<br>$R^2=0.20$ (S) |
| Lettuce+Cabbage              |                  | $y=0.1893x^2+0.2194x+10.432$ ;<br>$R^2=0.20$ (W)<br>$y=0.5347x^2-3.4197x+19.13$ ;<br>$R^2=0.98$ (S)   |                                           | $y=0.0181x^2-0.1509x+0.4841$ ;<br>$R^2=0.95$ (W)<br>$y=0.0283x^2-0.2974x+0.94$ ;<br>$R^2=0.67$ (S)   |
| Lettuce+Endive/<br>radicchio |                  | $y=-0.472x^2+5.0693x-2.9583$ ;<br>$R^2=0.89$ (W)<br>$y=-0.2781x^2+3.5527x-0.0031$ ;<br>$R^2=0.98$ (S) |                                           | $y=-0.0111x^2+0.077x+0.1404$ ;<br>$R^2=0.27$ (W)<br>$y=0.0097x^2-0.0388x+0.2897$ ;<br>$R^2=0.57$ (S) |
| Lettuce+Rocket               |                  | $y=0.502x+4.158$ ; $R^2=1$ (W)<br>$y=-0.5253x^2+5.6869x-5.9625$ ; $R^2=1$ (S)                         |                                           | $y=-0.0492x+0.409$ ; $R^2=1$ (W)<br>$y=-0.0039x^2+0.0001x+0.3294$ ;<br>$R^2=1$ (S)                   |
| Lettuce+Chives               |                  | $y=0.6507x^2-3.6527x+11.372$ ;<br>$R^2=1$ (W)<br>$y=0.0406x^2+0.6438x+3.965$ ;<br>$R^2=1$ (S)         |                                           | $y=0.0866x^2-0.6639x+1.3252$ ;<br>$R^2=1$ (W)<br>$y=0.0532x^2-0.3693x+0.861$ ;<br>$R^2=1$ (W)        |
| Rocket                       |                  | $y=0.2208x^2+0.6242x+2.555$ ;<br>$R^2=1$ (W)<br>$y=-0.6042x^2+5.4043x-1.6783$ ;<br>$R^2=0.62$ (S)     |                                           | $y=-0.1148x^2+0.6913x+0.6017$ ;<br>$R^2=1$ (W)<br>$y=-0.0193x^2+0.1774x+0.2264$ ;<br>$R^2=0.73$ (S)  |
| Other                        |                  | $y=0.343x^2-1.313x+5.0301$ ;<br>$R^2=0.65$ (W)<br>$y=-0.3465x^2+3.1683x+3.1033$ ;<br>$R^2=1$ (S)      |                                           | $y=0.0101x^2-0.0294x+0.4121$ ;<br>$R^2=0.20$ (W)<br>$y=0.0291x^2-0.2164x+0.6452$ ;<br>$R^2=1$ (S)    |

Figure S4. (Continued)

|                              | MDA (nmol/g Fw)                                                                     |                                                                                                     |
|------------------------------|-------------------------------------------------------------------------------------|-----------------------------------------------------------------------------------------------------|
| Lettuce                      | 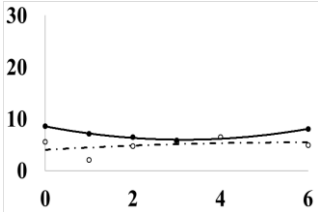   | $y=0.2601x^2-1.6429x+8.567;$<br>$R^2=0.99$ (W)<br>$y=-0.0423x^2+0.4921x+4.0235;$<br>$R^2=0.13$ (S)  |
| Lettuce+Cabbage              |    | $y=0.3637x^2-1.5484x+6.615;$ $R^2=1$ (W)<br>$y=1.5875x^2-15.648x+43.292;$<br>$R^2=0.74$ (S)         |
| Lettuce+Endive/<br>radicchio |    | $y=-0.052x^2+0.7069x+6.1172;$<br>$R^2=0.59$ (W)<br>$y=-0.5544x^2+5.7334x-3.2237;$<br>$R^2=0.29$ (S) |
| Lettuce+Rocket               |   | $y=-0.4685x+10.945;$ $R^2=1$ (W)<br>$y=1.0445x^2-9.3578x+27.012;$<br>$R^2=1$ (S)                    |
| Lettuce+Chives               |  | $y=0.9881x^2-7.2301x+19.413;$<br>$R^2=1$ (W)<br>$y=0.1919x^2-0.6568x+4.8891;$<br>$R^2=1$ (S)        |
| Rocket                       |  | $y=0.2841x^2-1.2304x+12.423;$<br>$R^2=1$ (W)<br>$y=0.7599x^2-3.7156x+10.945;$<br>$R^2=0.93$ (S)     |
| Other                        |  | $y=-0.3059x^2+2.4755x+9.6229;$<br>$R^2=0.29$ (W)<br>$y=-0.0791x^2+0.4891x+5.7124;$<br>$R^2=1$ (S)   |

Figure S4. (Continued)
